# Supplementary material
Source: Springer Nature journal article supplement (https://www.springermedizin.de/resource/supplementary/12937_2010_294_MOESM1_ESM.pdf/25654804)
Supplement: MOESM1 [file 25654804]

**Assessed for eligibility**  
N = 310 telephone  
screens/email contacts

**Enrollment**  
N = 90

**Randomized**

**Excluded n = 220**

Did not meet inclusion criteria as determined by telephone/email contact  
n = 150

Did not meet inclusion criteria after screening visit  
n = 51 (clinical and laboratory exclusions)

Refused to participate  
n = 17 (too much time, changed mind, job schedule)

Other reasons n = 2 (blood sample could not be obtained)

**No Vegetable Juice**  
Allocated to control  
n= 30

Completed allocated intervention  
n = 30

**8 fluid ounces Vegetable Juice**  
Allocated to intervention  
n= 30

Completed allocated intervention  
n = 28

Did not complete allocated intervention  
n = 2

Reasons: Mild rash (n=1); and non-compliance (n=1)

**16 fluid ounces Vegetable Juice**  
Allocated to intervention  
n= 30

Completed allocated intervention  
n = 28

Did not complete allocated intervention  
n = 2

Reasons: Mild rash (n=1); and mild heartburn (n=1)
